# Supplementary material for: CuO Nanoparticles and Microaggregates: An Experimental and Computational Study of Structure and Electronic Properties
Source: MDPI journal article supplement (doi:10.3390/ma16134800), 2023-07-03

# CuO Nanoparticles and Microaggregates: An Experimental and Computational Study of Structure and Electronic Properties

## Supplementary Information

### 1) Atomic coordinates of the tenorite cluster models

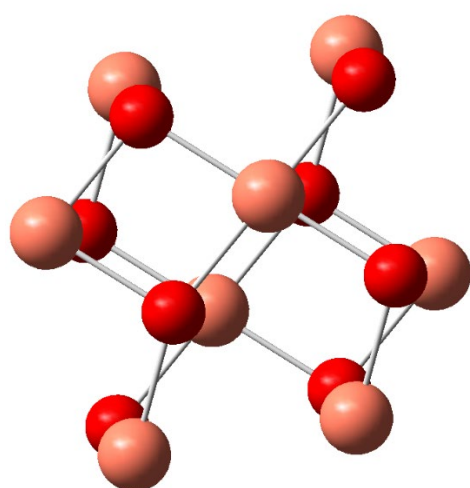

**CuO8**

Figure S1. CuO8.

16

|    |           |           |           |
|----|-----------|-----------|-----------|
| O  | -2.559000 | -0.279000 | 1.263000  |
| O  | -2.121000 | 0.279000  | -1.263000 |
| Cu | 1.607000  | -0.855000 | -2.525000 |
| Cu | 1.170000  | -2.566000 | 0.000000  |
| O  | -0.219000 | -1.989000 | 1.263000  |
| Cu | -1.170000 | -0.855000 | 0.000000  |
| Cu | 0.732000  | -0.855000 | 2.525000  |
| O  | 0.219000  | -1.431000 | -1.263000 |
| O  | 2.121000  | -0.279000 | 1.263000  |
| Cu | -0.732000 | 0.855000  | -2.525000 |
| Cu | 1.170000  | 0.855000  | 0.000000  |
| O  | -0.219000 | 1.431000  | 1.263000  |
| Cu | -1.607000 | 0.855000  | 2.525000  |
| Cu | -1.170000 | 2.566000  | 0.000000  |
| O  | 0.219000  | 1.989000  | -1.263000 |
| O  | 2.559000  | 0.279000  | -1.263000 |

# CuO16

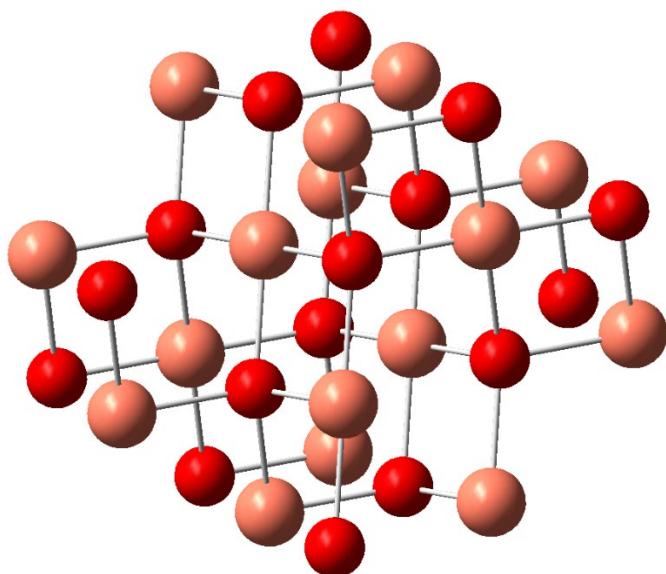

Figure S2.

CuO16.  
32

|    |           |           |           |
|----|-----------|-----------|-----------|
| Cu | -3.072000 | -0.855000 | -2.525000 |
| O  | -1.683000 | -0.279000 | -3.787000 |
| O  | -2.559000 | -0.279000 | 1.263000  |
| O  | -2.121000 | -3.141000 | -1.263000 |
| Cu | -3.510000 | 0.855000  | 0.000000  |
| O  | -2.559000 | 3.141000  | 1.263000  |
| O  | -2.121000 | 0.279000  | -1.263000 |
| Cu | -0.732000 | -2.566000 | -2.525000 |
| Cu | 1.607000  | -0.855000 | -2.525000 |
| Cu | 1.170000  | -2.566000 | 0.000000  |
| O  | -0.219000 | -1.989000 | 1.263000  |
| Cu | -1.607000 | -2.566000 | 2.525000  |
| Cu | -1.170000 | -0.855000 | 0.000000  |
| Cu | 0.732000  | -0.855000 | 2.525000  |
| O  | 0.219000  | -1.431000 | -1.263000 |
| O  | 2.121000  | -0.279000 | 1.263000  |
| O  | 2.559000  | -3.141000 | -1.263000 |
| O  | 0.656000  | 1.431000  | -3.787000 |
| Cu | -0.732000 | 0.855000  | -2.525000 |
| Cu | 1.607000  | 2.566000  | -2.525000 |
| Cu | 1.170000  | 0.855000  | 0.000000  |
| O  | -0.219000 | 1.431000  | 1.263000  |
| Cu | -1.607000 | 0.855000  | 2.525000  |
| Cu | -1.170000 | 2.566000  | 0.000000  |
| Cu | 0.732000  | 2.566000  | 2.525000  |
| O  | 0.219000  | 1.989000  | -1.263000 |
| O  | 2.121000  | 3.141000  | 1.263000  |
| O  | 2.559000  | 0.279000  | -1.263000 |
| O  | -0.656000 | -1.431000 | 3.787000  |
| Cu | 3.510000  | -0.855000 | 0.000000  |
| Cu | 3.072000  | 0.855000  | 2.525000  |
| O  | 1.683000  | 0.279000  | 3.787000  |

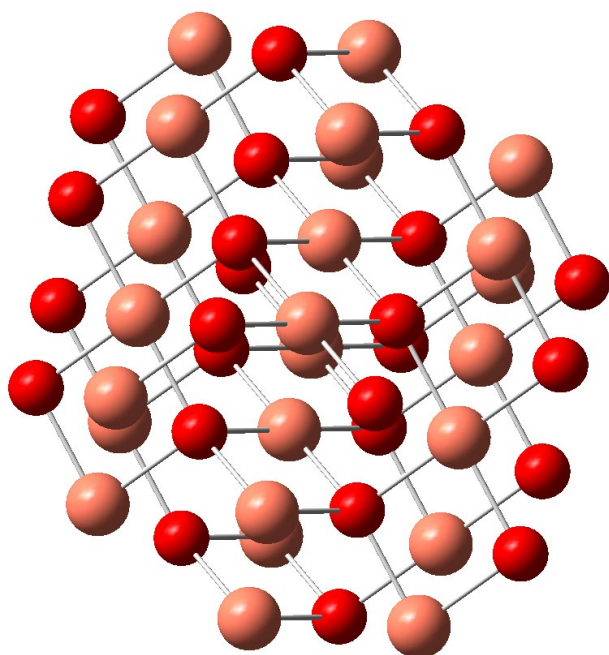

## CuO<sub>24</sub>

Figure S3. CuO<sub>24</sub>.

48

|    |           |           |           |
|----|-----------|-----------|-----------|
| Cu | -3.072000 | -0.855000 | -2.525000 |
| O  | -1.683000 | -0.279000 | -3.787000 |
| Cu | -3.510000 | -2.566000 | 0.000000  |
| Cu | -3.947000 | -0.855000 | 2.525000  |
| O  | -2.559000 | -3.700000 | 1.263000  |
| O  | -2.559000 | -0.279000 | 1.263000  |
| O  | -2.121000 | -3.141000 | -1.263000 |
| Cu | -3.072000 | 2.566000  | -2.525000 |
| Cu | -3.510000 | 0.855000  | 0.000000  |
| O  | -2.559000 | 3.141000  | 1.263000  |
| O  | -2.121000 | 0.279000  | -1.263000 |
| O  | 0.656000  | -1.989000 | -3.787000 |
| Cu | -0.732000 | -2.566000 | -2.525000 |
| Cu | 1.607000  | -0.855000 | -2.525000 |
| O  | 2.996000  | -0.279000 | -3.787000 |
| Cu | 1.170000  | -2.566000 | 0.000000  |
| O  | -0.219000 | -1.989000 | 1.263000  |
| Cu | -1.607000 | -2.566000 | 2.525000  |
| Cu | -1.170000 | -4.276000 | 0.000000  |
| Cu | -1.170000 | -0.855000 | 0.000000  |
| Cu | 0.732000  | -0.855000 | 2.525000  |
| O  | 0.219000  | -1.431000 | -1.263000 |
| O  | 2.121000  | -3.700000 | 1.263000  |
| O  | 2.121000  | -0.279000 | 1.263000  |
| O  | 2.559000  | -3.141000 | -1.263000 |
| O  | 0.656000  | 1.431000  | -3.787000 |
| Cu | -0.732000 | 0.855000  | -2.525000 |
| Cu | 1.607000  | 2.566000  | -2.525000 |
| Cu | 1.170000  | 0.855000  | 0.000000  |
| O  | -0.219000 | 1.431000  | 1.263000  |
| Cu | -1.607000 | 0.855000  | 2.525000  |
| Cu | -1.170000 | 2.566000  | 0.000000  |
| Cu | 0.732000  | 2.566000  | 2.525000  |
| O  | 0.219000  | 1.989000  | -1.263000 |
| O  | 2.121000  | 3.141000  | 1.263000  |

|    |           |           |           |
|----|-----------|-----------|-----------|
| O  | 2.559000  | 0.279000  | -1.263000 |
| O  | -0.656000 | -1.431000 | 3.787000  |
| O  | -0.656000 | 1.989000  | 3.787000  |
| O  | -2.996000 | 0.279000  | 3.787000  |
| Cu | 3.072000  | -2.566000 | 2.525000  |
| Cu | 3.510000  | -0.855000 | 0.000000  |
| Cu | 3.947000  | 0.855000  | -2.525000 |
| Cu | 3.072000  | 0.855000  | 2.525000  |
| Cu | 3.510000  | 2.566000  | 0.000000  |
| O  | 1.683000  | 0.279000  | 3.787000  |
| Cu | 1.170000  | 4.276000  | 0.000000  |
| O  | -2.121000 | 3.700000  | -1.263000 |
| O  | 2.559000  | 3.700000  | -1.263000 |

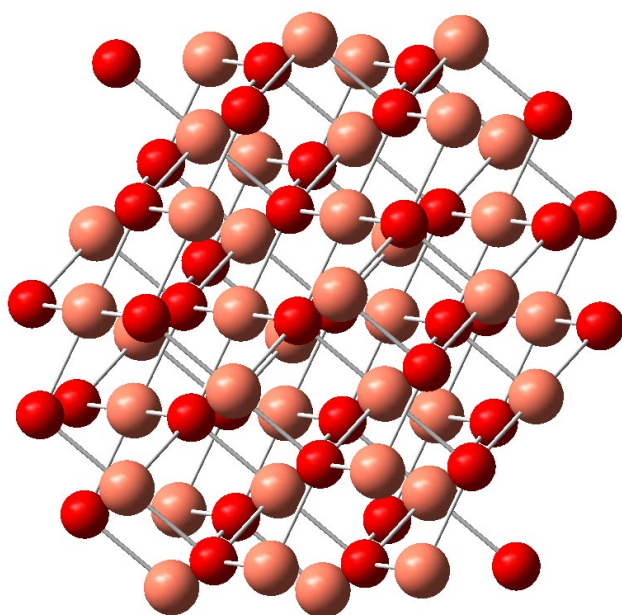

**CuO38**

Figure S4. CuO38.

76

|    |           |           |           |
|----|-----------|-----------|-----------|
| Cu | -3.072000 | -0.855000 | -2.525000 |
| O  | -1.683000 | -3.700000 | -3.787000 |
| O  | -1.683000 | -0.279000 | -3.787000 |
| Cu | -3.510000 | -2.566000 | 0.000000  |
| O  | -4.898000 | -1.989000 | 1.263000  |
| Cu | -3.947000 | -0.855000 | 2.525000  |
| O  | -4.461000 | -1.431000 | -1.263000 |
| O  | -2.559000 | -3.700000 | 1.263000  |
| O  | -2.559000 | -0.279000 | 1.263000  |
| O  | -2.121000 | -3.141000 | -1.263000 |
| Cu | -3.072000 | 2.566000  | -2.525000 |
| O  | -1.683000 | 3.141000  | -3.787000 |
| Cu | -3.510000 | 0.855000  | 0.000000  |
| O  | -4.898000 | 1.431000  | 1.263000  |
| Cu | -3.947000 | 2.566000  | 2.525000  |
| O  | -4.461000 | 1.989000  | -1.263000 |
| O  | -2.559000 | 3.141000  | 1.263000  |
| O  | -2.121000 | 0.279000  | -1.263000 |
| O  | 0.656000  | -1.989000 | -3.787000 |
| Cu | -0.732000 | -2.566000 | -2.525000 |
| Cu | -0.295000 | -0.855000 | -5.050000 |
| Cu | 1.607000  | -4.276000 | -2.525000 |
| Cu | 1.607000  | -0.855000 | -2.525000 |
| O  | 2.996000  | -0.279000 | -3.787000 |
| Cu | 1.170000  | -2.566000 | 0.000000  |
| O  | -0.219000 | -1.989000 | 1.263000  |
| Cu | -1.607000 | -2.566000 | 2.525000  |
| Cu | -1.170000 | -4.276000 | 0.000000  |
| Cu | -1.170000 | -0.855000 | 0.000000  |
| Cu | 0.732000  | -4.276000 | 2.525000  |
| Cu | 0.732000  | -0.855000 | 2.525000  |
| O  | 0.219000  | -4.852000 | -1.263000 |
| O  | 0.219000  | -1.431000 | -1.263000 |
| O  | 2.121000  | -3.700000 | 1.263000  |
| O  | 2.121000  | -0.279000 | 1.263000  |

|    |           |           |           |
|----|-----------|-----------|-----------|
| O  | 2.559000  | -3.141000 | -1.263000 |
| Cu | 2.045000  | 0.855000  | -5.050000 |
| O  | 0.656000  | 1.431000  | -3.787000 |
| Cu | -0.732000 | 0.855000  | -2.525000 |
| Cu | -0.295000 | 2.566000  | -5.050000 |
| Cu | 1.607000  | 2.566000  | -2.525000 |
| Cu | 1.170000  | 0.855000  | -0.000000 |
| O  | -0.219000 | 1.431000  | 1.263000  |
| Cu | -1.607000 | 0.855000  | 2.525000  |
| Cu | -1.170000 | 2.566000  | 0.000000  |
| Cu | 0.732000  | 2.566000  | 2.525000  |
| O  | 0.219000  | 1.989000  | -1.263000 |
| O  | 2.121000  | 3.141000  | 1.263000  |
| O  | 2.559000  | 0.279000  | -1.263000 |
| O  | -0.656000 | -1.431000 | 3.787000  |
| O  | -0.656000 | 1.989000  | 3.787000  |
| O  | -2.996000 | 0.279000  | 3.787000  |
| Cu | 3.947000  | -2.566000 | -2.525000 |
| O  | 4.898000  | -1.431000 | -1.263000 |
| Cu | 3.072000  | -2.566000 | 2.525000  |
| O  | 4.461000  | -1.989000 | 1.263000  |
| Cu | 3.510000  | -4.276000 | 0.000000  |
| Cu | 3.510000  | -0.855000 | 0.000000  |
| O  | 1.683000  | -3.141000 | 3.787000  |
| Cu | 3.947000  | 0.855000  | -2.525000 |
| O  | 4.898000  | 1.989000  | -1.263000 |
| Cu | 3.072000  | 0.855000  | 2.525000  |
| O  | 4.461000  | 1.431000  | 1.263000  |
| Cu | 3.510000  | 2.566000  | -0.000000 |
| O  | 1.683000  | 0.279000  | 3.787000  |
| Cu | -2.045000 | -0.855000 | 5.050000  |
| Cu | 0.295000  | 0.855000  | 5.050000  |
| Cu | 0.295000  | -2.566000 | 5.050000  |
| Cu | 1.170000  | 4.276000  | -0.000000 |
| Cu | -0.732000 | 4.276000  | -2.525000 |
| O  | -0.219000 | 4.852000  | 1.263000  |
| O  | -2.121000 | 3.700000  | -1.263000 |
| Cu | -1.607000 | 4.276000  | 2.525000  |
| O  | 2.559000  | 3.700000  | -1.263000 |
| O  | 1.683000  | 3.700000  | 3.787000  |
| Cu | -3.510000 | 4.276000  | 0.000000  |

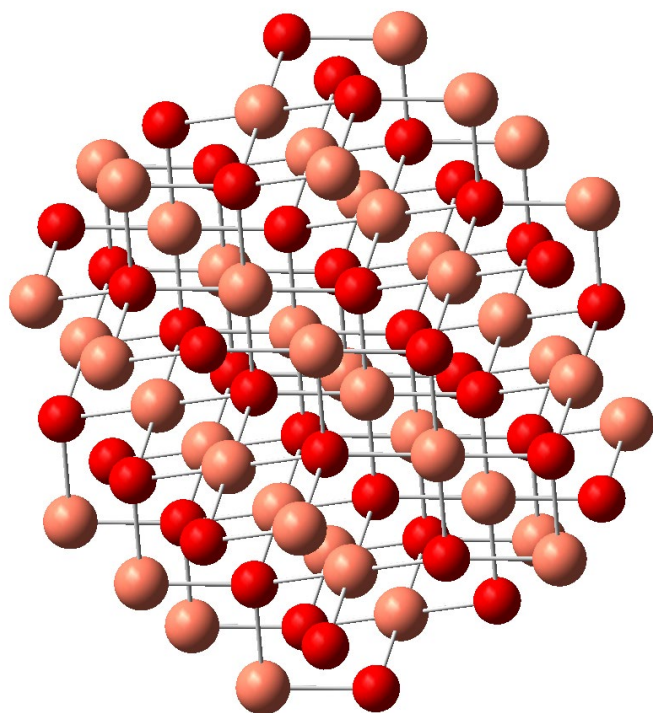

**CuO44**

Figure S5.

CuO44.  
88

|    |           |           |           |
|----|-----------|-----------|-----------|
| O  | -4.023000 | -1.989000 | -3.787000 |
| Cu | -3.072000 | -4.276000 | -2.525000 |
| Cu | -3.072000 | -0.855000 | -2.525000 |
| O  | -1.683000 | -3.700000 | -3.787000 |
| O  | -1.683000 | -0.279000 | -3.787000 |
| Cu | -3.510000 | -2.566000 | 0.000000  |
| O  | -4.898000 | -1.989000 | 1.263000  |
| Cu | -5.849000 | -0.855000 | 0.000000  |
| Cu | -3.947000 | -0.855000 | 2.525000  |
| O  | -4.461000 | -1.431000 | -1.263000 |
| O  | -2.559000 | -3.700000 | 1.263000  |
| O  | -2.559000 | -0.279000 | 1.263000  |
| O  | -2.121000 | -3.141000 | -1.263000 |
| Cu | -2.635000 | 0.855000  | -5.050000 |
| O  | -4.023000 | 1.431000  | -3.787000 |
| Cu | -3.072000 | 2.566000  | -2.525000 |
| O  | -1.683000 | 3.141000  | -3.787000 |
| Cu | -3.510000 | 0.855000  | 0.000000  |
| O  | -4.898000 | 1.431000  | 1.263000  |
| Cu | -3.947000 | 2.566000  | 2.525000  |
| O  | -4.461000 | 1.989000  | -1.263000 |
| O  | -2.559000 | 3.141000  | 1.263000  |
| O  | -2.121000 | 0.279000  | -1.263000 |
| O  | 0.656000  | -1.989000 | -3.787000 |
| Cu | -0.732000 | -2.566000 | -2.525000 |
| Cu | -0.295000 | -0.855000 | -5.050000 |
| Cu | 1.607000  | -4.276000 | -2.525000 |
| Cu | 1.607000  | -0.855000 | -2.525000 |
| O  | 2.996000  | -0.279000 | -3.787000 |
| Cu | 1.170000  | -2.566000 | 0.000000  |
| O  | -0.219000 | -1.989000 | 1.263000  |
| Cu | -1.607000 | -2.566000 | 2.525000  |

|    |           |           |           |
|----|-----------|-----------|-----------|
| Cu | -1.170000 | -4.276000 | 0.000000  |
| Cu | -1.170000 | -0.855000 | 0.000000  |
| Cu | 0.732000  | -4.276000 | 2.525000  |
| Cu | 0.732000  | -0.855000 | 2.525000  |
| O  | 0.219000  | -4.852000 | -1.263000 |
| O  | 0.219000  | -1.431000 | -1.263000 |
| O  | 2.121000  | -3.700000 | 1.263000  |
| O  | 2.121000  | -0.279000 | 1.263000  |
| O  | 2.559000  | -3.141000 | -1.263000 |
| Cu | 2.045000  | 0.855000  | -5.050000 |
| O  | 0.656000  | 1.431000  | -3.787000 |
| Cu | -0.732000 | 0.855000  | -2.525000 |
| Cu | -0.295000 | 2.566000  | -5.050000 |
| Cu | 1.607000  | 2.566000  | -2.525000 |
| O  | 2.996000  | 3.141000  | -3.787000 |
| Cu | 1.170000  | 0.855000  | -0.000000 |
| O  | -0.219000 | 1.431000  | 1.263000  |
| Cu | -1.607000 | 0.855000  | 2.525000  |
| Cu | -1.170000 | 2.566000  | 0.000000  |
| Cu | 0.732000  | 2.566000  | 2.525000  |
| O  | 0.219000  | 1.989000  | -1.263000 |
| O  | 2.121000  | 3.141000  | 1.263000  |
| O  | 2.559000  | 0.279000  | -1.263000 |
| O  | -0.656000 | -1.431000 | 3.787000  |
| O  | -2.996000 | -3.141000 | 3.787000  |
| O  | -0.656000 | 1.989000  | 3.787000  |
| O  | -2.996000 | 0.279000  | 3.787000  |
| Cu | 3.947000  | -2.566000 | -2.525000 |
| O  | 4.898000  | -1.431000 | -1.263000 |
| Cu | 3.072000  | -2.566000 | 2.525000  |
| O  | 4.461000  | -1.989000 | 1.263000  |
| Cu | 3.510000  | -4.276000 | 0.000000  |
| Cu | 3.510000  | -0.855000 | 0.000000  |
| O  | 4.023000  | -1.431000 | 3.787000  |
| O  | 1.683000  | -3.141000 | 3.787000  |
| Cu | 3.947000  | 0.855000  | -2.525000 |
| O  | 4.898000  | 1.989000  | -1.263000 |
| Cu | 3.072000  | 0.855000  | 2.525000  |
| O  | 4.461000  | 1.431000  | 1.263000  |
| Cu | 5.849000  | 0.855000  | -0.000000 |
| Cu | 3.510000  | 2.566000  | -0.000000 |
| O  | 4.023000  | 1.989000  | 3.787000  |
| O  | 1.683000  | 0.279000  | 3.787000  |
| Cu | -2.045000 | -0.855000 | 5.050000  |
| Cu | 0.295000  | 0.855000  | 5.050000  |
| Cu | 0.295000  | -2.566000 | 5.050000  |
| Cu | 1.170000  | 4.276000  | -0.000000 |
| Cu | -0.732000 | 4.276000  | -2.525000 |
| O  | -0.219000 | 4.852000  | 1.263000  |
| O  | -2.121000 | 3.700000  | -1.263000 |
| Cu | -1.607000 | 4.276000  | 2.525000  |
| Cu | 2.635000  | -0.855000 | 5.050000  |
| O  | 2.559000  | 3.700000  | -1.263000 |
| Cu | 3.072000  | 4.276000  | 2.525000  |
| O  | 1.683000  | 3.700000  | 3.787000  |
| Cu | -3.510000 | 4.276000  | 0.000000  |



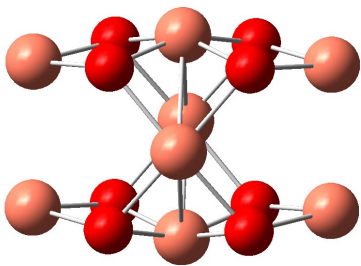

## CuO8\_opt

Figure S6. CuO8\_opt.

16

|    |           |           |           |
|----|-----------|-----------|-----------|
| O  | -2.070325 | 0.023723  | 0.977794  |
| O  | -1.828127 | 0.158858  | -1.369712 |
| Cu | 1.089919  | -0.774498 | -2.456223 |
| Cu | 1.152939  | -1.271038 | 0.045569  |
| O  | -0.214558 | -2.022923 | 1.051596  |
| Cu | -1.220602 | -1.113735 | -0.190175 |
| Cu | 0.579195  | -1.065790 | 2.521713  |
| O  | 0.028249  | -1.886881 | -1.296189 |
| O  | 1.828127  | -0.158858 | 1.369712  |
| Cu | -0.579195 | 1.065790  | -2.521713 |
| Cu | 1.220602  | 1.113735  | 0.190175  |
| O  | -0.028249 | 1.886881  | 1.296189  |
| Cu | -1.089919 | 0.774498  | 2.456223  |
| Cu | -1.152939 | 1.271038  | -0.045569 |
| O  | 0.214558  | 2.022923  | -1.051596 |
| O  | 2.070325  | -0.023723 | -0.977794 |

# CuO16\_opt

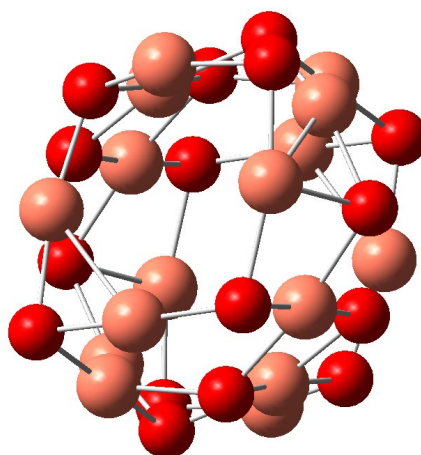

Figure S7. CuO16\_opt.

32

|    |           |           |           |
|----|-----------|-----------|-----------|
| Cu | -0.766807 | -0.772067 | -4.102777 |
| O  | -2.210636 | -0.386214 | -2.919703 |
| O  | -2.641448 | -1.415678 | 1.951641  |
| O  | -0.785437 | -2.506608 | -3.928865 |
| Cu | -2.420513 | 0.363514  | 1.616430  |
| O  | -1.851898 | 2.093771  | 1.542204  |
| O  | -2.091281 | 1.175635  | -0.774700 |
| Cu | -1.546452 | -1.885132 | -2.131756 |
| Cu | 0.776898  | -2.476612 | -2.967768 |
| Cu | 0.861793  | -2.169578 | -0.049025 |
| O  | 0.117824  | -2.316753 | 1.637836  |
| Cu | -1.215742 | -1.246969 | 3.035662  |
| Cu | -1.588438 | -2.195031 | 0.757494  |
| Cu | 1.264664  | -1.052284 | 2.348492  |
| O  | -0.745362 | -2.839909 | -0.725995 |
| O  | 2.091281  | -1.175635 | 0.774700  |
| O  | 1.851898  | -2.093771 | -1.542204 |
| O  | -0.365283 | 1.023227  | -3.952834 |
| Cu | -1.264664 | 1.052284  | -2.348492 |
| Cu | 1.215742  | 1.246969  | -3.035662 |
| Cu | 1.588438  | 2.195031  | -0.757494 |
| O  | 0.745362  | 2.839909  | 0.725995  |
| Cu | -0.776898 | 2.476612  | 2.967768  |
| Cu | -0.861793 | 2.169578  | 0.049025  |
| Cu | 1.546452  | 1.885132  | 2.131756  |
| O  | -0.117824 | 2.316753  | -1.637836 |
| O  | 0.785437  | 2.506608  | 3.928865  |
| O  | 2.641448  | 1.415678  | -1.951641 |
| O  | 0.365283  | -1.023227 | 3.952834  |
| Cu | 2.420513  | -0.363514 | -1.616430 |
| Cu | 0.766807  | 0.772067  | 4.102777  |
| O  | 2.210636  | 0.386214  | 2.919703  |

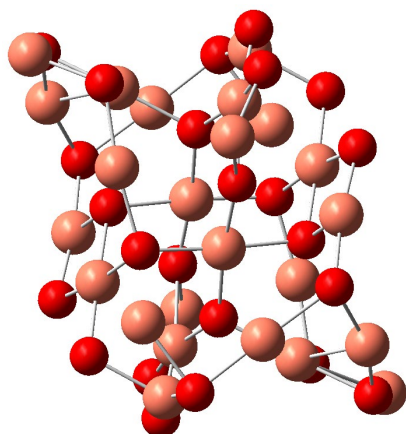

## CuO24\_opt

Figure S8. CuO24\_opt.

48

|    |           |           |           |
|----|-----------|-----------|-----------|
| Cu | -2.940874 | -1.658160 | -1.988669 |
| O  | -1.383110 | -1.007322 | -3.558877 |
| Cu | -2.166558 | -3.416696 | -0.278017 |
| Cu | -3.902055 | -0.032300 | 2.084671  |
| O  | -1.969354 | -3.469885 | 1.600694  |
| O  | -2.168922 | -0.370260 | 1.325303  |
| O  | -2.158445 | -3.358186 | -2.125398 |
| Cu | -2.849487 | 4.551261  | -0.428143 |
| Cu | -2.648756 | 1.449657  | -0.453647 |
| O  | -2.863006 | 3.006074  | 0.463874  |
| O  | -2.021347 | -0.115228 | -1.223549 |
| O  | 0.923431  | -2.396007 | -3.455049 |
| Cu | -0.704219 | -2.583051 | -2.895546 |
| Cu | 1.608077  | -1.162940 | -2.357774 |
| O  | 3.030905  | -0.954612 | -3.356751 |
| Cu | 0.942312  | -3.316767 | -0.360892 |
| O  | 0.081983  | -1.648608 | 1.458131  |
| Cu | -1.265168 | -2.119045 | 2.566865  |
| Cu | -0.483320 | -4.479198 | 1.208218  |
| Cu | -0.985059 | -0.940228 | 0.086920  |
| Cu | 0.800899  | -0.318062 | 2.523306  |
| O  | 0.277546  | -1.693658 | -1.079133 |
| O  | 1.096355  | -4.957340 | 0.438825  |
| O  | 2.021347  | 0.115228  | 1.223549  |
| O  | 2.863006  | -3.006074 | -0.463874 |
| O  | 0.469203  | 0.965575  | -3.608276 |
| Cu | -0.800899 | 0.318062  | -2.523306 |
| Cu | 1.265168  | 2.119045  | -2.566865 |
| Cu | 0.985059  | 0.940228  | -0.086920 |
| O  | -0.277546 | 1.693658  | 1.079133  |
| Cu | -1.608077 | 1.162940  | 2.357774  |
| Cu | -0.942312 | 3.316767  | 0.360892  |
| Cu | 0.704219  | 2.583051  | 2.895546  |
| O  | -0.081983 | 1.648608  | -1.458131 |
| O  | 2.158445  | 3.358186  | 2.125398  |
| O  | 2.168922  | 0.370260  | -1.325303 |
| O  | -0.469203 | -0.965575 | 3.608276  |
| O  | -0.923431 | 2.396007  | 3.455049  |
| O  | -3.030905 | 0.954612  | 3.356751  |
| Cu | 2.849487  | -4.551261 | 0.428143  |
| Cu | 2.648756  | -1.449657 | 0.453647  |
| Cu | 3.902055  | 0.032300  | -2.084671 |

|    |           |          |           |
|----|-----------|----------|-----------|
| Cu | 2.940874  | 1.658160 | 1.988669  |
| Cu | 2.166558  | 3.416696 | 0.278017  |
| O  | 1.383110  | 1.007322 | 3.558877  |
| Cu | 0.483320  | 4.479198 | -1.208218 |
| O  | -1.096355 | 4.957340 | -0.438825 |
| O  | 1.969354  | 3.469885 | -1.600694 |

Figure S9 – Theoretical infrared spectrum calculated with DFT for CuO8 and CuO16 relaxed models

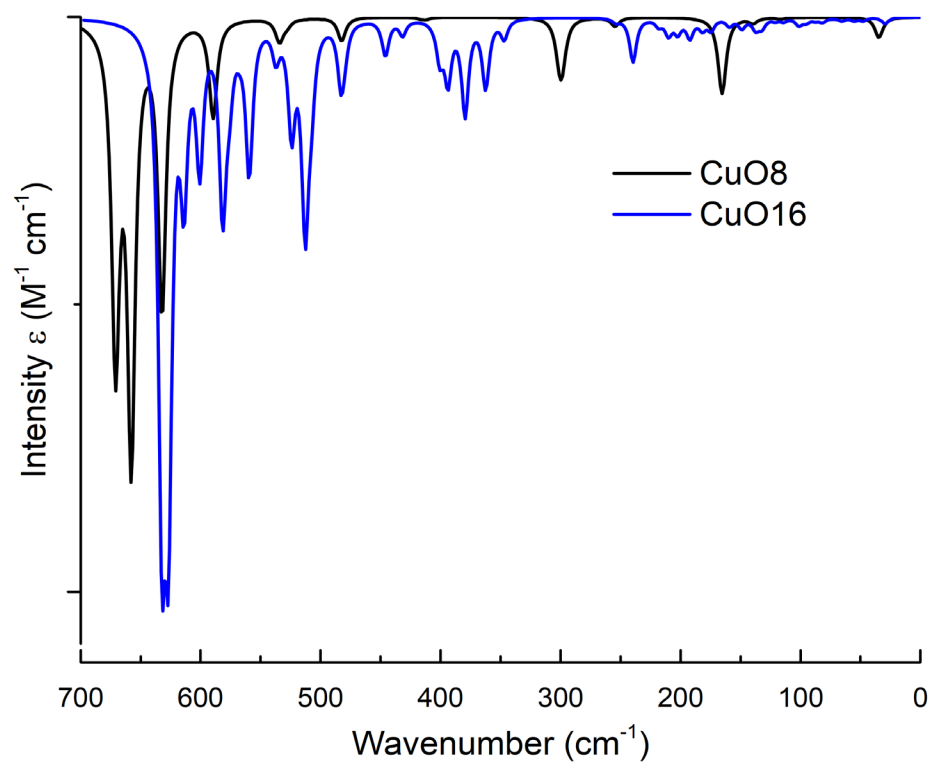

Supplement: s1 [file s1]
